# Supplementary material for: Targeting the WSB2–NOXA axis in cancer cells for enhanced sensitivity to BCL-2 family protein inhibitors
Source: eLife. 2025 Jul 23;13:RP98372. doi: 10.7554/eLife.98372 (PMC12286604; doi:10.7554/eLife.98372)
Supplement: Supplementary file 1. [file elife-98372-supp1.xlsx]

## Sheet: Supplementary File 1
Supplementary File 1. Top 100 co-dependent genes of WSB2.
Gene	Correlation
BCL2L2	0.379913
BAX	-0.253163
THAP3	0.2136
MCL1	0.197555
IRS2	0.196794
ISL1	0.191519
PMAIP1	-0.18896
ZNF664	0.18847
KBTBD2	0.180351
ATP6V1G1	-0.17879
CLIP1	0.17693
SOX11	0.176834
IGF1R	0.176536
PRKAB1	0.171726
RFLNA	0.171699
TAOK3	0.171532
BCL2L1	0.171163
CIT	0.170301
DEPDC4	0.167687
RILPL2	0.166787
HAND2	0.165194
THOC6	0.163919
NAV3	0.162372
UBE2F	0.162334
ORC6	0.161309
GSTA4	-0.161238
FADS2	-0.161062
PATZ1	0.160735
TBX20	0.160057
MPHOSPH9	0.158832
MORN3	0.158548
ATP13A1	0.158132
RIMBP2	0.156692
TRA2B	0.156558
GBX2	0.156003
TMEM120B	0.155578
ATG4B	0.152466
NEU4	0.152266
GABPB1	0.152021
CHMP4B	0.151443
ADCYAP1	0.150481
RNFT2	0.150371
IL31	0.149478
LMOD1	-0.149369
PCM1	0.149349
TAF15	-0.148157
STX2	0.148044
CNPY2	0.147632
MYL2	0.146631
NAA15	-0.14645
TMEM233	0.14628
HCAR2	0.146094
KDM2B	0.145218
YBX1	0.14509
ARIH1	-0.144785
MAP10	0.144629
RBM33	0.144105
ABHD13	0.143538
ATP1A1	-0.143191
ATP6V1B1	-0.142887
AFMID	0.142828
CEP55	0.142532
HNRNPUL1	-0.142334
IGF2BP1	0.142032
GRM2	-0.14188
PTEN	-0.141183
TMEM30A	-0.141055
ARHGAP29	-0.140545
DDB1	-0.140374
MMP8	-0.140128
LDB1	0.140108
RAB6A	-0.140106
COPS7B	0.139224
MSI1	0.138979
LIN28B	0.138918
PITPNM2	0.138549
ZNF84	0.138268
PTPRF	-0.137994
GATA3	0.137907
CDK5RAP2	0.137724
TAZ	-0.136599
CAPN11	-0.136323
EIF4G2	0.13619
GLT1D1	0.136142
CHFR	0.136075
ACOXL	-0.136008
HMGCR	-0.135589
PIK3R3	-0.135423
TUBGCP3	0.135188
MYT1	0.13491
TPX2	0.134633
CCER1	0.134437
FBXW8	0.134397
DHX9	0.134288
ACADS	0.132434
BRI3BP	0.132283
MGAT2	-0.131855
MYC	-0.13184
MYH9	-0.131579
BCL7A	0.130238
