# Supplementary material for: Targeting the WSB2–NOXA axis in cancer cells for enhanced sensitivity to BCL-2 family protein inhibitors
Source: eLife. 2025 Jul 23;13:RP98372. doi: 10.7554/eLife.98372 (PMC12286604; doi:10.7554/eLife.98372)
Supplement: Supplementary file 3. [file elife-98372-supp3.xlsx]

## Sheet: Supplementary File 3
Supplementary File 3. DepLink analysis of top correlated drugs with WSB2.
Data Source	Broad ID	Drug Name	Correlation with Broad DepMap	Correlation with Sanger DepMap	Max Correlation	Avg Correlation
GDSC	BRD-K56301217	ABT-737	0.27	0.316	0.316	0.293
GDSC	BRD-K82746043	ABT-263	0.237	0.292	0.292	0.264
PRISM	BRD-K14993104-001-05-9	bemegride	0.022	0.261	0.261	0.142
PRISM	BRD-K82746043-001-15-1	ABT-263	0.161	0.257	0.257	0.209
PRISM	BRD-K77171813-034-01-8	proxyfan	0.039	0.242	0.242	0.14
PRISM	BRD-K23952234-236-01-8	BMS-986020	0.005	0.241	0.241	0.123
GDSC	WEHI-539, WEHI539	WEHI-539, WEHI539	0.153	0.241	0.241	0.197
PRISM	BRD-K88742110-001-07-9	PCI-34051	0.004	0.24	0.24	0.122
PRISM	BRD-K00674894-001-01-4	orteronel	0.009	0.228	0.228	0.119
PRISM	BRD-K87048468-003-02-7	RS-102221	0.025	0.224	0.224	0.124
