# Supplementary material for: Targeting the WSB2–NOXA axis in cancer cells for enhanced sensitivity to BCL-2 family protein inhibitors
Source: eLife. 2025 Jul 23;13:RP98372. doi: 10.7554/eLife.98372 (PMC12286604; doi:10.7554/eLife.98372)
Supplement: Supplementary file 4. [file elife-98372-supp4.xlsx]

## Sheet: Supplementary File 4
Supplementary File 4. Sequence information.
Sequence of RT-PCR
Gene names	Sequence
NOXA	F: 5- CCAAGCCGTGACCAAGGAC -3
	R: 5- CGCCACATTGTGTAGCACCT -3
GAPDH	F: 5- GGAGCGAGATCCCTCCAAAAT -3
	R: 5- GGCTGTTGTCATACTTCTCATGG -3
Sequences of sgRNAs
WSB2-sgRNA-1	5- AACTCAAGCCCGGGCGCCCC -3
WSB2-sgRNA-2	5- CTTGCTACGGGACTCAACGA -3
Wsb2-sgRNA-1	5- GCCTTCAGGATGCACCACAT -3
Wsb2-sgRNA-2	5- GTCTGAAAGCAGTCTAGTTG -3
Sequences of genotyping
Wsb2-PCR-1	5- TGAGAGTCCCAAGGGTAAGTACC -3
	5- GGCTTGGATCAATGTGCATTG -3
Wsb2-PCR-2	5- TTTGGGACCTGAATAAGCACG -3
	5- GTCTTGTCAGTGGTGCCTAAACG -3
Primers for amplification of sgRNA-targeted sequence of WSB2 gene
WSB2-sgRNA1-PA:	5- GCTGTTATTGCCCTGGGTCA -3
WSB2-sgRNA1-PB:	5- TTGGAAATGCGCCGGATGGG -3
WSB2-sgRNA2-PA:	5- AAAGCCGAAGTAGCAAAAAT -3
WSB2-sgRNA2-PB:	5- CTGAGTCAGCCAGAGAGGGG -3
Sequences of shRNAs
shWSB2#1：	5- CAATGGTCTTTGCTGCACGTT -3
shWSB2#2：	5- CCAGACACTATTACTGGCTTT -3
shNOXA#1：（human）	5- GGAAACGGAAGATGGAATA -3
shNOXA#1： (mouse)	5- CGTGTGTTATTGTAAGCATTA -3
Sequences of siRNAs
siWSB2#1	5- GCAUCUGGGACCUGAAUAATT -3
siWSB2#2	5- GCCCUUCGAAGUUUCCUAATT -3
siCUL5#1	5- GGAGGACUUGAUACCGGAATT -3
siCUL5#2	5- GGUUUGAAUCAGUCACCUATT -3
siRBX2#1	5- GUCCAAAGAAUCGGCAAAUTT -3
siRBX2#2	5- GGAGAAUGUAAUCAUUCCUTT -3
siELOB#1	5- GGUUUGACAGCAUGUUCAATT -3
siELOB#2	5- ACCUUUAAUAAACAGUCUATT -3
siELOC#1	5- CGAACUUCUUAGAUUGUUATT -3
siELOC#2	5- CCUGUAGUUCAGUUAGUAATT -3
Short Peptide
name	Amino acid sequence
R8	RRRRRRRR
R8-C-ter-NOXA	RRRRRRRRRQKLLNLISKLFCS
C-ter-NOXA	RQKLLNLISKLFCS
